# Supplementary material for: A network analysis of nutritional markers and maternal perinatal mental health in the French EDEN cohort
Source: Springer Nature journal article supplement (doi:10.1186/s12884-023-05914-w), 2023-08-23

## **A Network Analysis of Nutritional Markers and Maternal Perinatal Mental Health in the French EDEN Cohort**

**Online Resource 1:** Bootstrapped difference test Macronutrient network model, adjusted. The grey area represents the bootstrapped confidence intervals, while the black line represents the sample values (edges).

**Online Resource 1b:** Bootstrapped difference test Micronutrient network model, adjusted

● Bootstrap mean ● Sample

*Online Resource 1: Bootstrapped difference test Micronutrient network model, adjusted*

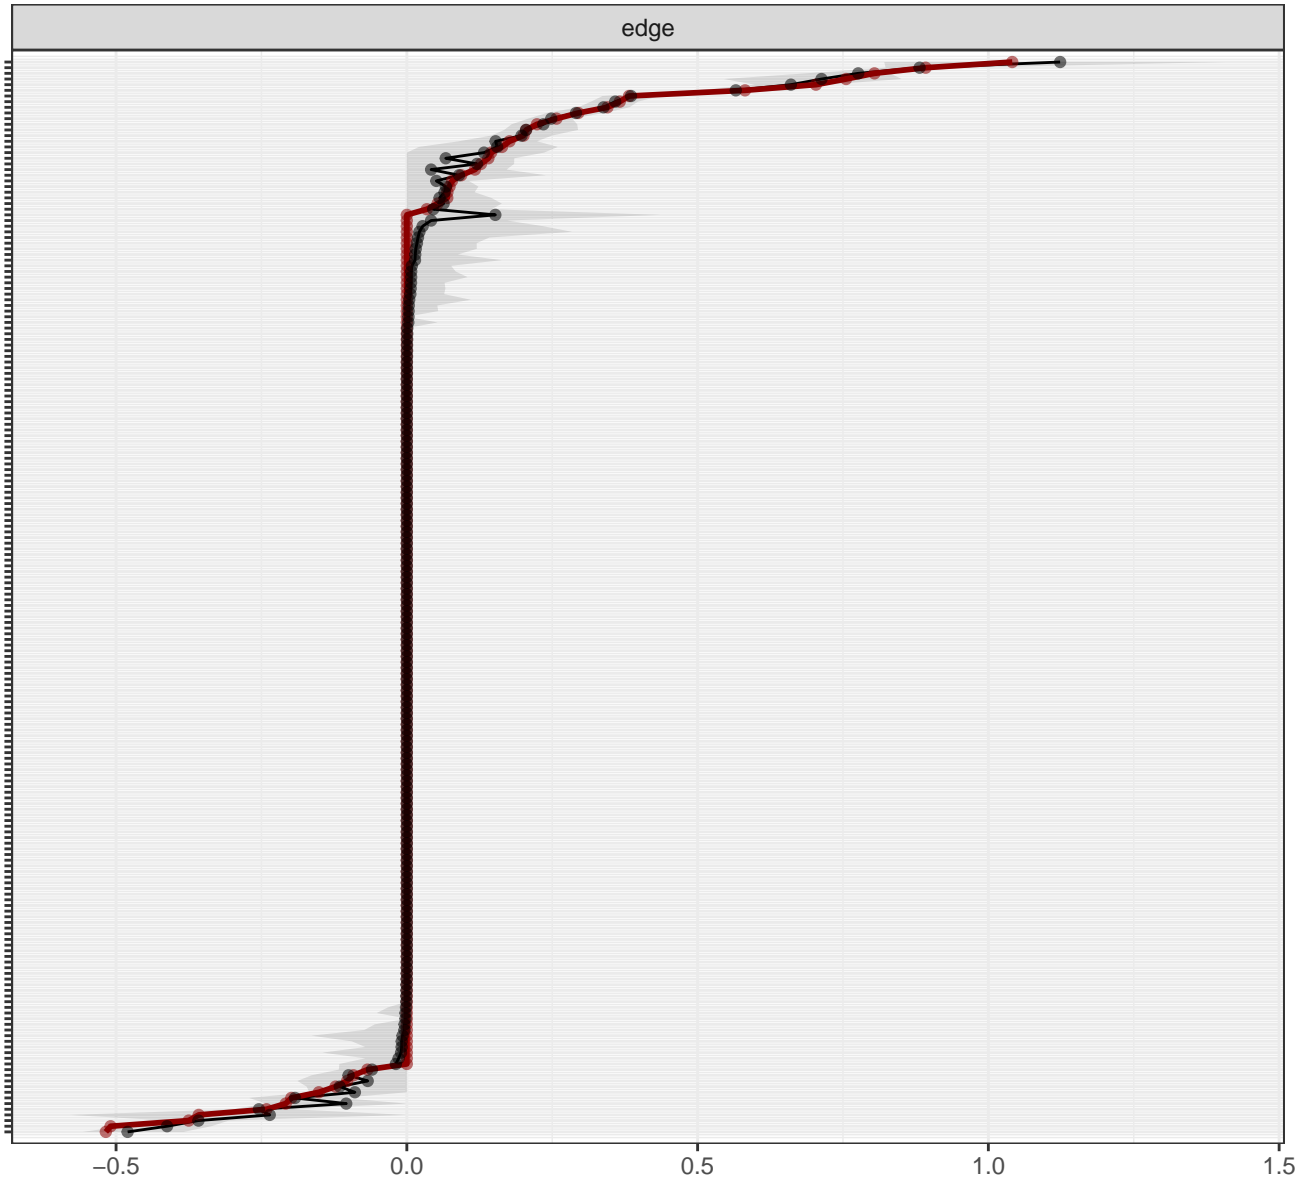

● Bootstrap mean ● Sample

*Online Resource 1b: Bootstrapped difference test Micronutrient network model, adjusted*

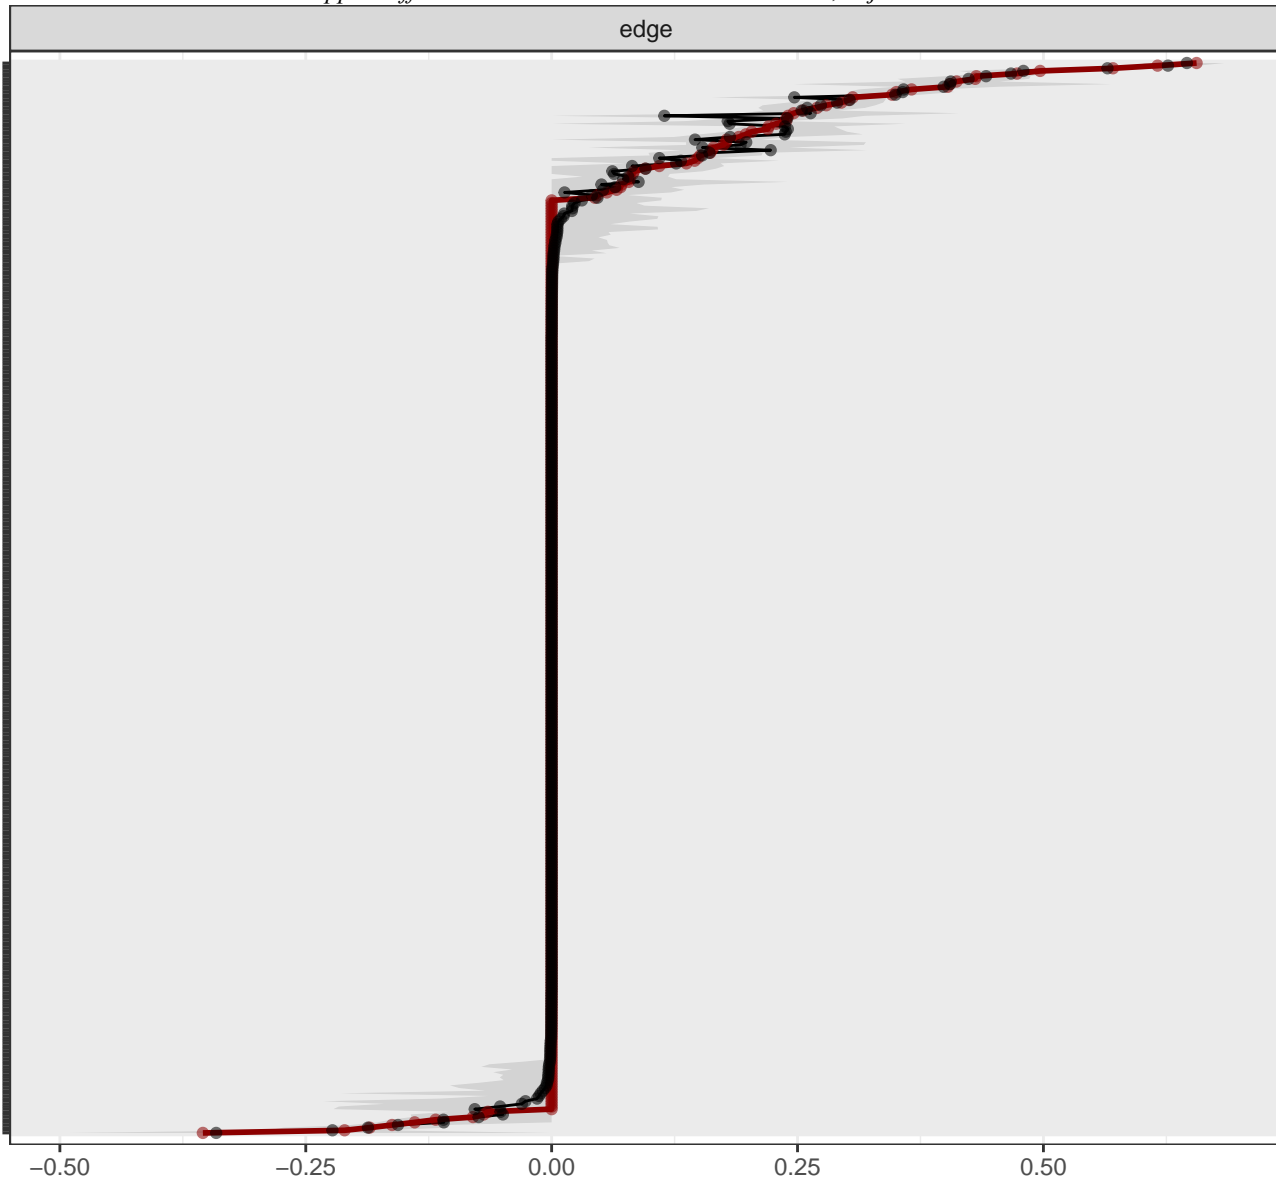

Supplement: 12884_2023_5914_MOESM1_ESM.pdf [file 12884_2023_5914_MOESM1_ESM.pdf]
