# Supplementary material for: A network analysis of nutritional markers and maternal perinatal mental health in the French EDEN cohort
Source: Springer Nature journal article supplement (doi:10.1186/s12884-023-05914-w), 2023-08-23
Supplement: 12884_2023_5914_MOESM2_ESM.pdf [file 12884_2023_5914_MOESM2_ESM.pdf]

**A Network Analysis of Nutritional Markers and Maternal Perinatal Mental Health in the French EDEN Cohort**

**Online Resource 2:** Edge-weight bootstrapped difference test, *Macronutrient* adjusted model. Black  
**Online Resource 2b:** Edge-weight bootstrapped difference test, *Micronutrient* adjusted model



## edge

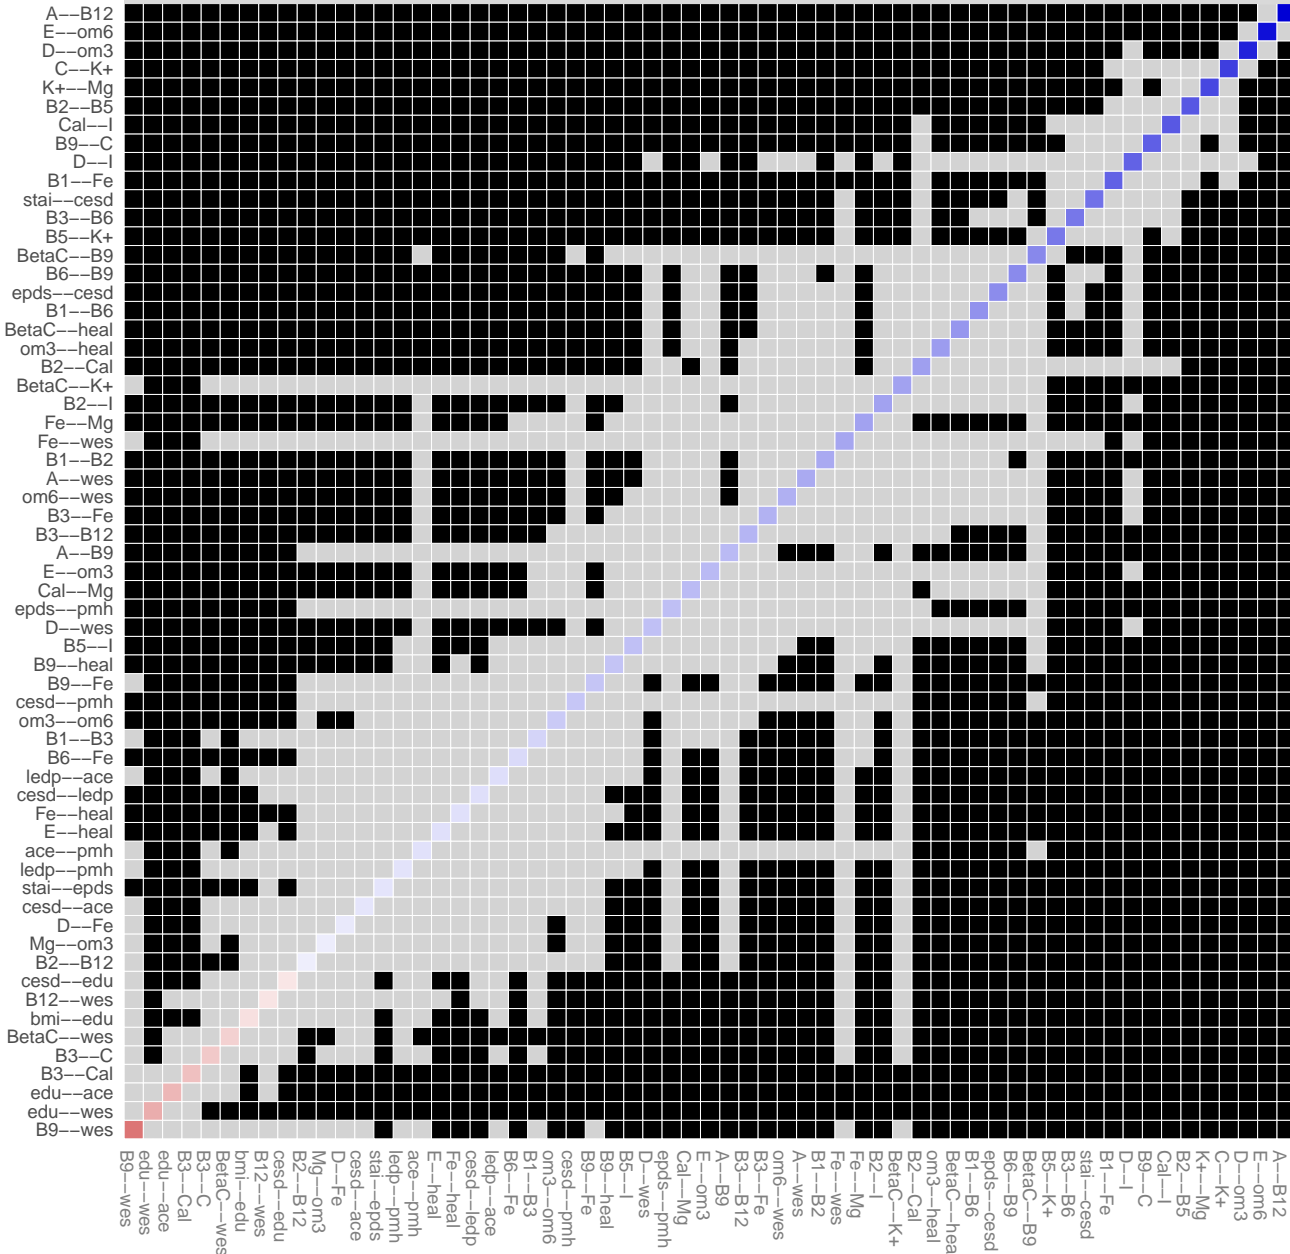

Online Resource 2b: Edge difference tests for the edges in the estimated micronutrient network.
